# Supplementary material
Source: Elsevier journal article supplement (http://library.osu.edu/sites/msa/suppmat/v236.i1.pp1-10/mmc1.pdf)
Supplement: mmc1 [file mmc1.pdf]

## Supplementary Material

In the tables that follow, the assigned transitions for the seven identified chloropropanol species are listed, together with the residuals obtained from the best fit to the data. Energy levels involved in transitions are labelled using the quantum number scheme  $J_{K_a K_c}(F)$ , where  $J$  is the total rotational angular momentum,  $K_a$  the projection of  $J$  along the  $a$  axis in the prolate symmetric rotor limit,  $K_c$  the analogous projection along the  $c$  axis in the oblate rotor limit, and  $F$  the total angular momentum after coupling of  $J$  to the nuclear quadrupole moment,  $I$ .

## A1. Assigned Transitions for *m-ga* 1-chloropropan-2-ol, <sup>35</sup>Cl Isotopomer

| Transition                                             | $\nu_{obs}/\text{MHz}$ | $\nu_{obs-pred}/\text{kHz}$ |
|--------------------------------------------------------|------------------------|-----------------------------|
| $1_{10}(\frac{1}{2}) \leftarrow 1_{01}(\frac{1}{2})$   | 6598.1692              | 0.15                        |
| $1_{10}(\frac{3}{2}) \leftarrow 1_{01}(\frac{1}{2})$   | 6612.2667              | -0.02                       |
| $1_{10}(\frac{5}{2}) \leftarrow 1_{01}(\frac{5}{2})$   | 6613.4343              | -0.86                       |
| $1_{10}(\frac{1}{2}) \leftarrow 1_{01}(\frac{3}{2})$   | 6618.4180              | 1.86                        |
| $1_{10}(\frac{3}{2}) \leftarrow 1_{01}(\frac{5}{2})$   | 6621.2574              | -0.87                       |
| $1_{10}(\frac{5}{2}) \leftarrow 1_{01}(\frac{3}{2})$   | 6624.6925              | 1.79                        |
| $1_{10}(\frac{3}{2}) \leftarrow 1_{01}(\frac{3}{2})$   | 6632.5131              | -0.71                       |
| $2_{02}(\frac{3}{2}) \leftarrow 1_{01}(\frac{1}{2})$   | 8089.2258              | 0.32                        |
| $2_{02}(\frac{5}{2}) \leftarrow 1_{01}(\frac{5}{2})$   | 8090.0647              | 0.56                        |
| $2_{02}(\frac{3}{2}) \leftarrow 1_{01}(\frac{5}{2})$   | 8098.2159              | -1.13                       |
| $2_{02}(\frac{1}{2}) \leftarrow 1_{01}(\frac{1}{2})$   | 8100.5829              | 0.28                        |
| $2_{02}(\frac{7}{2}) \leftarrow 1_{01}(\frac{5}{2})$   | 8101.3821              | 1.36                        |
| $4_{13}(\frac{7}{2}) \leftarrow 4_{04}(\frac{5}{2})$   | 8316.5161              | 0.03                        |
| $4_{13}(\frac{9}{2}) \leftarrow 4_{04}(\frac{11}{2})$  | 8318.0167              | -1.32                       |
| $4_{13}(\frac{5}{2}) \leftarrow 4_{04}(\frac{5}{2})$   | 8323.9323              | -1.26                       |
| $4_{13}(\frac{11}{2}) \leftarrow 4_{04}(\frac{11}{2})$ | 8325.4800              | -0.90                       |
| $4_{13}(\frac{9}{2}) \leftarrow 4_{04}(\frac{7}{2})$   | 8325.6146              | 1.13                        |
| $4_{13}(\frac{7}{2}) \leftarrow 4_{04}(\frac{7}{2})$   | 8328.2435              | 0.81                        |
| $4_{13}(\frac{7}{2}) \leftarrow 4_{04}(\frac{9}{2})$   | 8332.3528              | -1.83                       |
| $4_{13}(\frac{5}{2}) \leftarrow 4_{04}(\frac{7}{2})$   | 8335.6593              | -0.88                       |
| $4_{13}(\frac{11}{2}) \leftarrow 4_{04}(\frac{9}{2})$  | 8337.1921              | 3.81                        |
| $2_{11}(\frac{7}{2}) \leftarrow 1_{10}(\frac{5}{2})$   | 8459.5585              | 1.54                        |
| $2_{11}(\frac{3}{2}) \leftarrow 1_{10}(\frac{1}{2})$   | 8464.8637              | -0.67                       |
| $2_{11}(\frac{1}{2}) \leftarrow 1_{10}(\frac{1}{2})$   | 8468.3103              | -0.33                       |
| $4_{04}(\frac{11}{2}) \leftarrow 3_{12}(\frac{9}{2})$  | 8560.6452              | 2.55                        |

| Transition                                             | $\nu_{obs}/\text{MHz}$ | $\nu_{obs-pred}/\text{kHz}$ |
|--------------------------------------------------------|------------------------|-----------------------------|
| $5_{14}(\frac{9}{2}) \leftarrow 5_{05}(\frac{7}{2})$   | 9377.3477              | 0.15                        |
| $5_{14}(\frac{7}{2}) \leftarrow 5_{05}(\frac{7}{2})$   | 9385.4512              | -1.03                       |
| $5_{14}(\frac{13}{2}) \leftarrow 5_{05}(\frac{13}{2})$ | 9386.5305              | 0.22                        |
| $5_{14}(\frac{11}{2}) \leftarrow 5_{05}(\frac{9}{2})$  | 9387.0537              | 0.76                        |
| $5_{14}(\frac{9}{2}) \leftarrow 5_{05}(\frac{9}{2})$   | 9389.3179              | -1.23                       |
| $5_{14}(\frac{11}{2}) \leftarrow 5_{05}(\frac{11}{2})$ | 9390.4304              | 0.45                        |
| $5_{14}(\frac{9}{2}) \leftarrow 5_{05}(\frac{11}{2})$  | 9392.6943              | -1.84                       |
| $5_{14}(\frac{7}{2}) \leftarrow 5_{05}(\frac{9}{2})$   | 9397.4219              | -1.91                       |
| $5_{14}(\frac{13}{2}) \leftarrow 5_{05}(\frac{11}{2})$ | 9398.4916              | 4.19                        |
| $1_{11}(\frac{1}{2}) \leftarrow 0_{00}(\frac{3}{2})$   | 10327.9363             | 0.19                        |
| $1_{11}(\frac{5}{2}) \leftarrow 0_{00}(\frac{3}{2})$   | 10330.6833             | 0.68                        |
| $1_{11}(\frac{3}{2}) \leftarrow 0_{00}(\frac{3}{2})$   | 10334.0965             | 0.58                        |
| $4_{04}(\frac{9}{2}) \leftarrow 3_{13}(\frac{9}{2})$   | 10604.7708             | -3.22                       |
| $4_{04}(\frac{7}{2}) \leftarrow 3_{13}(\frac{5}{2})$   | 10614.5670             | -0.39                       |
| $4_{04}(\frac{9}{2}) \leftarrow 3_{13}(\frac{7}{2})$   | 10615.4470             | 0.63                        |
| $4_{04}(\frac{5}{2}) \leftarrow 3_{13}(\frac{3}{2})$   | 10615.6225             | -0.81                       |
| $4_{04}(\frac{11}{2}) \leftarrow 3_{13}(\frac{9}{2})$  | 10616.4816             | 0.19                        |
| $4_{04}(\frac{7}{2}) \leftarrow 3_{13}(\frac{7}{2})$   | 10619.5571             | -1.21                       |
| $4_{04}(\frac{5}{2}) \leftarrow 3_{13}(\frac{5}{2})$   | 10626.2936             | -0.41                       |
| $1_{10}(\frac{1}{2}) \leftarrow 0_{00}(\frac{3}{2})$   | 10666.4519             | 1.27                        |
| $1_{10}(\frac{5}{2}) \leftarrow 0_{00}(\frac{3}{2})$   | 10672.7259             | 0.71                        |
| $1_{10}(\frac{3}{2}) \leftarrow 0_{00}(\frac{3}{2})$   | 10680.5480             | -0.30                       |
| $6_{15}(\frac{11}{2}) \leftarrow 6_{06}(\frac{9}{2})$  | 10743.0826             | 0.48                        |
| $6_{15}(\frac{9}{2}) \leftarrow 6_{06}(\frac{9}{2})$   | 10751.5857             | -1.03                       |
| $6_{15}(\frac{15}{2}) \leftarrow 6_{06}(\frac{15}{2})$ | 10752.4660             | -0.10                       |

| Transition                                             | $\nu_{obs}/\text{MHz}$ | $\nu_{obs-pred}/\text{kHz}$ | Transition                                            | $\nu_{obs}/\text{MHz}$ | $\nu_{obs-pred}/\text{kHz}$ |
|--------------------------------------------------------|------------------------|-----------------------------|-------------------------------------------------------|------------------------|-----------------------------|
| $6_{15}(\frac{13}{2}) \leftarrow 6_{06}(\frac{11}{2})$ | 10753.3306             | 2.63                        | $3_{21}(\frac{7}{2}) \leftarrow 2_{20}(\frac{5}{2})$  | 12217.6231             | -0.18                       |
| $6_{15}(\frac{11}{2}) \leftarrow 6_{06}(\frac{11}{2})$ | 10755.3282             | -1.00                       | $3_{21}(\frac{3}{2}) \leftarrow 2_{20}(\frac{3}{2})$  | 12225.3545             | -2.13                       |
| $6_{15}(\frac{13}{2}) \leftarrow 6_{06}(\frac{13}{2})$ | 10756.2239             | -0.12                       | $3_{21}(\frac{5}{2}) \leftarrow 2_{20}(\frac{3}{2})$  | 12225.6446             | 0.52                        |
| $6_{15}(\frac{11}{2}) \leftarrow 6_{06}(\frac{13}{2})$ | 10758.2239             | -1.35                       | $3_{21}(\frac{9}{2}) \leftarrow 2_{20}(\frac{7}{2})$  | 12228.7302             | -0.10                       |
| $6_{15}(\frac{9}{2}) \leftarrow 6_{06}(\frac{11}{2})$  | 10763.8312             | -2.62                       | $3_{21}(\frac{3}{2}) \leftarrow 2_{20}(\frac{1}{2})$  | 12236.7020             | 0.84                        |
| $6_{15}(\frac{15}{2}) \leftarrow 6_{06}(\frac{13}{2})$ | 10764.7065             | 3.78                        | $3_{12}(\frac{7}{2}) \leftarrow 2_{11}(\frac{7}{2})$  | 12671.5941             | -0.15                       |
| $3_{13}(\frac{5}{2}) \leftarrow 2_{12}(\frac{3}{2})$   | 11646.1167             | -0.26                       | $3_{12}(\frac{5}{2}) \leftarrow 2_{11}(\frac{7}{2})$  | 12674.5148             | -2.25                       |
| $3_{13}(\frac{7}{2}) \leftarrow 2_{12}(\frac{5}{2})$   | 11646.7308             | 0.63                        | $3_{12}(\frac{7}{2}) \leftarrow 2_{11}(\frac{5}{2})$  | 12674.9991             | 1.38                        |
| $3_{13}(\frac{3}{2}) \leftarrow 2_{12}(\frac{1}{2})$   | 11648.9607             | 0.23                        | $3_{12}(\frac{5}{2}) \leftarrow 2_{11}(\frac{3}{2})$  | 12675.4829             | -1.31                       |
| $3_{13}(\frac{9}{2}) \leftarrow 2_{12}(\frac{7}{2})$   | 11649.5814             | 1.23                        | $3_{12}(\frac{3}{2}) \leftarrow 2_{11}(\frac{1}{2})$  | 12678.3121             | -1.11                       |
| $3_{13}(\frac{5}{2}) \leftarrow 2_{12}(\frac{5}{2})$   | 11651.7220             | 0.91                        | $3_{12}(\frac{3}{2}) \leftarrow 2_{11}(\frac{3}{2})$  | 12681.7600             | 0.53                        |
| $3_{13}(\frac{3}{2}) \leftarrow 2_{12}(\frac{3}{2})$   | 11656.7863             | -1.36                       | $2_{12}(\frac{3}{2}) \leftarrow 1_{01}(\frac{1}{2})$  | 14034.2193             | 2.09                        |
| $5_{05}(\frac{11}{2}) \leftarrow 4_{13}(\frac{9}{2})$  | 11688.1911             | -0.69                       | $2_{12}(\frac{5}{2}) \leftarrow 1_{01}(\frac{5}{2})$  | 14037.6047             | 0.08                        |
| $5_{05}(\frac{9}{2}) \leftarrow 4_{13}(\frac{7}{2})$   | 11688.9401             | 0.53                        | $2_{12}(\frac{1}{2}) \leftarrow 1_{01}(\frac{1}{2})$  | 14042.0461             | 1.70                        |
| $5_{05}(\frac{13}{2}) \leftarrow 4_{13}(\frac{11}{2})$ | 11692.6862             | 0.17                        | $2_{12}(\frac{3}{2}) \leftarrow 1_{01}(\frac{5}{2})$  | 14043.2082             | -0.55                       |
| $5_{05}(\frac{7}{2}) \leftarrow 4_{13}(\frac{5}{2})$   | 11693.4941             | 0.44                        | $2_{12}(\frac{7}{2}) \leftarrow 1_{01}(\frac{5}{2})$  | 14045.4291             | 2.13                        |
| $4_{42}(\frac{5}{2}) \leftarrow 5_{24}(\frac{7}{2})$   | 12014.3408             | 1.12                        | $2_{12}(\frac{5}{2}) \leftarrow 1_{01}(\frac{3}{2})$  | 14048.8612             | 1.04                        |
| $4_{42}(\frac{11}{2}) \leftarrow 5_{24}(\frac{13}{2})$ | 12017.6950             | 0.56                        | $2_{12}(\frac{3}{2}) \leftarrow 1_{01}(\frac{3}{2})$  | 14054.4658             | 1.50                        |
| $4_{42}(\frac{7}{2}) \leftarrow 5_{24}(\frac{9}{2})$   | 12025.2068             | -0.19                       | $2_{12}(\frac{1}{2}) \leftarrow 1_{01}(\frac{3}{2})$  | 14062.2922             | 0.71                        |
| $4_{42}(\frac{9}{2}) \leftarrow 5_{24}(\frac{11}{2})$  | 12028.5109             | -1.74                       | $4_{14}(\frac{9}{2}) \leftarrow 3_{13}(\frac{9}{2})$  | 15504.6974             | -1.72                       |
| $3_{03}(\frac{7}{2}) \leftarrow 2_{02}(\frac{7}{2})$   | 12105.6041             | -0.64                       | $4_{14}(\frac{7}{2}) \leftarrow 3_{13}(\frac{5}{2})$  | 15514.5479             | 0.31                        |
| $3_{03}(\frac{5}{2}) \leftarrow 2_{02}(\frac{3}{2})$   | 12114.1482             | 0.99                        | $4_{14}(\frac{9}{2}) \leftarrow 3_{13}(\frac{7}{2})$  | 15515.3725             | 1.04                        |
| $3_{03}(\frac{3}{2}) \leftarrow 2_{02}(\frac{1}{2})$   | 12114.3154             | 1.07                        | $4_{14}(\frac{5}{2}) \leftarrow 3_{13}(\frac{3}{2})$  | 15515.7138             | -0.16                       |
| $3_{03}(\frac{7}{2}) \leftarrow 2_{02}(\frac{5}{2})$   | 12116.9230             | 1.66                        | $4_{14}(\frac{11}{2}) \leftarrow 3_{13}(\frac{9}{2})$ | 15516.5504             | 1.44                        |
| $3_{03}(\frac{9}{2}) \leftarrow 2_{02}(\frac{7}{2})$   | 12117.1034             | 1.68                        | $4_{04}(\frac{9}{2}) \leftarrow 3_{03}(\frac{9}{2})$  | 16081.2974             | -1.30                       |
| $3_{03}(\frac{5}{2}) \leftarrow 2_{02}(\frac{5}{2})$   | 12122.3004             | 0.30                        | $4_{04}(\frac{7}{2}) \leftarrow 3_{03}(\frac{5}{2})$  | 16091.5295             | 0.63                        |
| $3_{03}(\frac{3}{2}) \leftarrow 2_{02}(\frac{3}{2})$   | 12125.6715             | 0.03                        | $4_{04}(\frac{5}{2}) \leftarrow 3_{03}(\frac{3}{2})$  | 16091.7320             | 0.78                        |
| $3_{22}(\frac{7}{2}) \leftarrow 2_{21}(\frac{5}{2})$   | 12162.9593             | 0.23                        | $4_{04}(\frac{9}{2}) \leftarrow 3_{03}(\frac{7}{2})$  | 16092.7996             | 3.92                        |
| $3_{22}(\frac{5}{2}) \leftarrow 2_{21}(\frac{3}{2})$   | 12171.0129             | 0.89                        | $4_{04}(\frac{11}{2}) \leftarrow 3_{03}(\frac{9}{2})$ | 16093.0080             | 1.91                        |
| $3_{22}(\frac{9}{2}) \leftarrow 2_{21}(\frac{7}{2})$   | 12174.2153             | 0.73                        | $4_{04}(\frac{7}{2}) \leftarrow 3_{03}(\frac{7}{2})$  | 16096.9074             | -0.22                       |
| $3_{22}(\frac{3}{2}) \leftarrow 2_{21}(\frac{1}{2})$   | 12182.2442             | 0.57                        | $4_{04}(\frac{5}{2}) \leftarrow 3_{03}(\frac{5}{2})$  | 16103.2554             | -0.08                       |

| Transition                                             | $\nu_{obs}/\text{MHz}$ | $\nu_{obs-pred}/\text{kHz}$ |
|--------------------------------------------------------|------------------------|-----------------------------|
| $4_{23}(\frac{9}{2}) \leftarrow 3_{22}(\frac{7}{2})$   | 16214.4276             | 0.39                        |
| $4_{23}(\frac{7}{2}) \leftarrow 3_{22}(\frac{5}{2})$   | 16216.0254             | 0.89                        |
| $4_{23}(\frac{11}{2}) \leftarrow 3_{22}(\frac{9}{2})$  | 16218.9642             | 2.14                        |
| $4_{22}(\frac{9}{2}) \leftarrow 3_{21}(\frac{7}{2})$   | 16350.0074             | 0.19                        |
| $4_{22}(\frac{7}{2}) \leftarrow 3_{21}(\frac{5}{2})$   | 16351.5126             | -1.91                       |
| $4_{22}(\frac{11}{2}) \leftarrow 3_{21}(\frac{9}{2})$  | 16354.3078             | 0.22                        |
| $4_{22}(\frac{5}{2}) \leftarrow 3_{21}(\frac{3}{2})$   | 16355.8748             | -0.73                       |
| $6_{24}(\frac{15}{2}) \leftarrow 6_{15}(\frac{15}{2})$ | 16779.8385             | 1.50                        |
| $6_{24}(\frac{11}{2}) \leftarrow 6_{15}(\frac{11}{2})$ | 16780.8519             | 1.38                        |
| $6_{24}(\frac{13}{2}) \leftarrow 6_{15}(\frac{13}{2})$ | 16781.1770             | 1.36                        |
| $4_{13}(\frac{9}{2}) \leftarrow 3_{12}(\frac{9}{2})$   | 16878.6595             | -1.17                       |
| $4_{13}(\frac{7}{2}) \leftarrow 3_{12}(\frac{5}{2})$   | 16884.6256             | -1.01                       |
| $4_{13}(\frac{5}{2}) \leftarrow 3_{12}(\frac{3}{2})$   | 16885.7688             | -0.05                       |
| $4_{13}(\frac{11}{2}) \leftarrow 3_{12}(\frac{9}{2})$  | 16886.1249             | 1.35                        |
| $4_{13}(\frac{7}{2}) \leftarrow 3_{12}(\frac{7}{2})$   | 16887.5479             | -1.51                       |
| $5_{23}(\frac{9}{2}) \leftarrow 5_{14}(\frac{7}{2})$   | 17288.0265             | 4.97                        |
| $5_{23}(\frac{11}{2}) \leftarrow 5_{14}(\frac{13}{2})$ | 17288.6260             | 0.01                        |
| $5_{23}(\frac{7}{2}) \leftarrow 5_{14}(\frac{7}{2})$   | 17294.1411             | 3.00                        |
| $5_{23}(\frac{11}{2}) \leftarrow 5_{14}(\frac{9}{2})$  | 17294.4135             | -3.77                       |
| $5_{23}(\frac{13}{2}) \leftarrow 5_{14}(\frac{13}{2})$ | 17294.7064             | -5.07                       |
| $5_{23}(\frac{9}{2}) \leftarrow 5_{14}(\frac{9}{2})$   | 17296.1211             | -5.12                       |
| $5_{23}(\frac{11}{2}) \leftarrow 5_{14}(\frac{11}{2})$ | 17296.6820             | -1.45                       |
| $5_{23}(\frac{9}{2}) \leftarrow 5_{14}(\frac{11}{2})$  | 17298.3940             | 1.60                        |
| $5_{23}(\frac{7}{2}) \leftarrow 5_{14}(\frac{9}{2})$   | 17302.2352             | -7.58                       |
| $5_{23}(\frac{13}{2}) \leftarrow 5_{14}(\frac{11}{2})$ | 17302.7735             | 4.57                        |
| $3_{13}(\frac{7}{2}) \leftarrow 2_{02}(\frac{7}{2})$   | 17582.9534             | -0.66                       |
| $3_{13}(\frac{5}{2}) \leftarrow 2_{02}(\frac{7}{2})$   | 17587.9417             | -3.27                       |
| $3_{13}(\frac{3}{2}) \leftarrow 2_{02}(\frac{1}{2})$   | 17590.4221             | -0.15                       |
| $3_{13}(\frac{5}{2}) \leftarrow 2_{02}(\frac{3}{2})$   | 17591.1097             | 1.02                        |
| $3_{13}(\frac{9}{2}) \leftarrow 2_{02}(\frac{7}{2})$   | 17593.6231             | -3.30                       |
| $3_{13}(\frac{7}{2}) \leftarrow 2_{02}(\frac{5}{2})$   | 17594.2671             | -3.56                       |

| Transition                                             | $\nu_{obs}/\text{MHz}$ | $\nu_{obs-pred}/\text{kHz}$ |
|--------------------------------------------------------|------------------------|-----------------------------|
| $3_{13}(\frac{5}{2}) \leftarrow 2_{02}(\frac{5}{2})$   | 17599.2608             | -0.77                       |
| $3_{13}(\frac{3}{2}) \leftarrow 2_{02}(\frac{3}{2})$   | 17601.7757             | -3.68                       |
| $3_{13}(\frac{3}{2}) \leftarrow 2_{02}(\frac{5}{2})$   | 17609.9288             | -3.47                       |
| $4_{22}(\frac{5}{2}) \leftarrow 4_{13}(\frac{5}{2})$   | 17850.3002             | -3.84                       |
| $4_{22}(\frac{11}{2}) \leftarrow 4_{13}(\frac{11}{2})$ | 17851.4493             | 3.55                        |
| $4_{22}(\frac{7}{2}) \leftarrow 4_{13}(\frac{7}{2})$   | 17853.6508             | 2.83                        |
| $4_{22}(\frac{9}{2}) \leftarrow 4_{13}(\frac{9}{2})$   | 17854.8667             | 3.29                        |

## A2. Assigned Transitions for *m-ga* 1-chloropropan-2-ol, $^{37}\text{Cl}$ Isotopomer

| Transition                                             | $\nu_{obs}/\text{MHz}$ | $\nu_{obs-pred}/\text{kHz}$ | Transition                                             | $\nu_{obs}/\text{MHz}$ | $\nu_{obs-pred}/\text{kHz}$ |
|--------------------------------------------------------|------------------------|-----------------------------|--------------------------------------------------------|------------------------|-----------------------------|
| $1_{10}(\frac{5}{2}) \leftarrow 1_{01}(\frac{5}{2})$   | 6653.7772              | -0.29                       | $4_{04}(\frac{5}{2}) \leftarrow 3_{13}(\frac{3}{2})$   | 10150.6427             | -1.14                       |
| $1_{10}(\frac{1}{2}) \leftarrow 1_{01}(\frac{1}{2})$   | 6641.7332              | 1.09                        | $1_{11}(\frac{1}{2}) \leftarrow 0_{00}(\frac{3}{2})$   | 10287.3152             | 0.72                        |
| $1_{10}(\frac{3}{2}) \leftarrow 1_{01}(\frac{1}{2})$   | 6652.8571              | -0.71                       | $1_{11}(\frac{3}{2}) \leftarrow 0_{00}(\frac{3}{2})$   | 10292.1661             | 1.57                        |
| $2_{02}(\frac{5}{2}) \leftarrow 1_{01}(\frac{5}{2})$   | 7899.5474              | -0.94                       | $1_{11}(\frac{5}{2}) \leftarrow 0_{00}(\frac{3}{2})$   | 10289.4788             | 1.77                        |
| $2_{02}(\frac{3}{2}) \leftarrow 1_{01}(\frac{1}{2})$   | 7898.8786              | -1.18                       | $6_{15}(\frac{15}{2}) \leftarrow 6_{06}(\frac{15}{2})$ | 10564.6380             | 2.38                        |
| $2_{02}(\frac{1}{2}) \leftarrow 1_{01}(\frac{1}{2})$   | 7907.8313              | -2.54                       | $6_{15}(\frac{13}{2}) \leftarrow 6_{06}(\frac{13}{2})$ | 10567.5816             | 0.24                        |
| $2_{02}(\frac{7}{2}) \leftarrow 1_{01}(\frac{5}{2})$   | 7908.4713              | 1.21                        | $6_{15}(\frac{11}{2}) \leftarrow 6_{06}(\frac{11}{2})$ | 10566.8814             | 0.96                        |
| $2_{11}(\frac{7}{2}) \leftarrow 1_{10}(\frac{5}{2})$   | 8248.8281              | 0.31                        | $6_{15}(\frac{9}{2}) \leftarrow 6_{06}(\frac{9}{2})$   | 10563.9439             | -1.79                       |
| $2_{11}(\frac{5}{2}) \leftarrow 1_{10}(\frac{5}{2})$   | 8246.1453              | -0.84                       | $1_{10}(\frac{5}{2}) \leftarrow 0_{00}(\frac{3}{2})$   | 10615.5598             | -7.01                       |
| $2_{11}(\frac{5}{2}) \leftarrow 1_{10}(\frac{3}{2})$   | 8239.9753              | 1.59                        | $1_{10}(\frac{3}{2}) \leftarrow 0_{00}(\frac{3}{2})$   | 10621.7392             | -0.03                       |
| $2_{11}(\frac{3}{2}) \leftarrow 1_{10}(\frac{3}{2})$   | 8241.8924              | 0.67                        | $1_{10}(\frac{1}{2}) \leftarrow 0_{00}(\frac{3}{2})$   | 10610.6158             | 2.27                        |
| $4_{13}(\frac{11}{2}) \leftarrow 4_{04}(\frac{11}{2})$ | 8276.4968              | 0.55                        | $3_{13}(\frac{9}{2}) \leftarrow 2_{12}(\frac{7}{2})$   | 11383.2633             | 2.47                        |
| $4_{13}(\frac{9}{2}) \leftarrow 4_{04}(\frac{7}{2})$   | 8276.6090              | 1.57                        | $3_{13}(\frac{7}{2}) \leftarrow 2_{12}(\frac{7}{2})$   | 11374.8408             | -0.35                       |
| $4_{13}(\frac{7}{2}) \leftarrow 4_{04}(\frac{7}{2})$   | 8278.6716              | 0.19                        | $3_{13}(\frac{7}{2}) \leftarrow 2_{12}(\frac{5}{2})$   | 11381.0173             | 1.85                        |
| $4_{13}(\frac{5}{2}) \leftarrow 4_{04}(\frac{5}{2})$   | 8275.2952              | 0.83                        | $3_{13}(\frac{5}{2}) \leftarrow 2_{12}(\frac{3}{2})$   | 11380.5299             | -0.42                       |
| $4_{13}(\frac{11}{2}) \leftarrow 4_{04}(\frac{9}{2})$  | 8285.7152              | 1.61                        | $3_{03}(\frac{9}{2}) \leftarrow 2_{02}(\frac{7}{2})$   | 11831.2696             | 1.97                        |
| $4_{13}(\frac{7}{2}) \leftarrow 4_{04}(\frac{9}{2})$   | 8281.9058              | -2.00                       | $3_{03}(\frac{7}{2}) \leftarrow 2_{02}(\frac{7}{2})$   | 11822.2076             | -1.19                       |
| $5_{14}(\frac{13}{2}) \leftarrow 5_{05}(\frac{13}{2})$ | 9277.8819              | 0.71                        | $3_{03}(\frac{7}{2}) \leftarrow 2_{02}(\frac{5}{2})$   | 11831.1310             | 0.46                        |
| $5_{14}(\frac{11}{2}) \leftarrow 5_{05}(\frac{11}{2})$ | 9280.9441              | 0.66                        | $3_{03}(\frac{5}{2}) \leftarrow 2_{02}(\frac{5}{2})$   | 11835.3677             | 0.96                        |
| $5_{14}(\frac{9}{2}) \leftarrow 5_{05}(\frac{9}{2})$   | 9280.0719              | 0.82                        | $3_{03}(\frac{5}{2}) \leftarrow 2_{02}(\frac{3}{2})$   | 11828.9437             | 0.51                        |
| $5_{14}(\frac{7}{2}) \leftarrow 5_{05}(\frac{7}{2})$   | 9277.0343              | -1.70                       | $3_{03}(\frac{3}{2}) \leftarrow 2_{02}(\frac{3}{2})$   | 11838.0204             | -0.39                       |
| $4_{04}(\frac{11}{2}) \leftarrow 3_{13}(\frac{9}{2})$  | 10151.3300             | 0.56                        | $3_{03}(\frac{3}{2}) \leftarrow 2_{02}(\frac{1}{2})$   | 11829.0687             | 1.97                        |
| $4_{04}(\frac{9}{2}) \leftarrow 3_{13}(\frac{9}{2})$   | 10142.1104             | -1.71                       | $3_{22}(\frac{9}{2}) \leftarrow 2_{21}(\frac{7}{2})$   | 11882.4661             | 3.31                        |
| $4_{04}(\frac{9}{2}) \leftarrow 3_{13}(\frac{7}{2})$   | 10150.5320             | 0.21                        | $3_{22}(\frac{7}{2}) \leftarrow 2_{21}(\frac{5}{2})$   | 11873.5900             | 1.50                        |
| $4_{04}(\frac{7}{2}) \leftarrow 3_{13}(\frac{5}{2})$   | 10149.8324             | 0.39                        | $3_{22}(\frac{5}{2}) \leftarrow 2_{21}(\frac{3}{2})$   | 11879.9357             | 1.10                        |

| Transition                                             | $\nu_{obs}/\text{MHz}$ | $\nu_{obs-pred}/\text{kHz}$ |
|--------------------------------------------------------|------------------------|-----------------------------|
| $3_{22}(\frac{3}{2}) \leftarrow 2_{21}(\frac{1}{2})$   | 11888.7981             | 1.34                        |
| $3_{21}(\frac{9}{2}) \leftarrow 2_{20}(\frac{7}{2})$   | 11931.6276             | 0.88                        |
| $3_{21}(\frac{7}{2}) \leftarrow 2_{20}(\frac{5}{2})$   | 11922.8659             | -1.08                       |
| $3_{21}(\frac{5}{2}) \leftarrow 2_{20}(\frac{3}{2})$   | 11929.1828             | -1.09                       |
| $3_{21}(\frac{3}{2}) \leftarrow 2_{20}(\frac{1}{2})$   | 11937.9205             | 0.03                        |
| $3_{12}(\frac{9}{2}) \leftarrow 2_{11}(\frac{7}{2})$   | 12363.2078             | 1.26                        |
| $3_{12}(\frac{7}{2}) \leftarrow 2_{11}(\frac{5}{2})$   | 12358.2753             | -0.03                       |
| $3_{12}(\frac{5}{2}) \leftarrow 2_{11}(\frac{3}{2})$   | 12360.9581             | 1.12                        |
| $3_{12}(\frac{3}{2}) \leftarrow 2_{11}(\frac{1}{2})$   | 12361.3414             | 0.59                        |
| $3_{12}(\frac{3}{2}) \leftarrow 2_{11}(\frac{1}{2})$   | 12363.5717             | -0.64                       |
| $2_{12}(\frac{7}{2}) \leftarrow 1_{01}(\frac{5}{2})$   | 13923.1991             | 1.91                        |
| $2_{12}(\frac{5}{2}) \leftarrow 1_{01}(\frac{3}{2})$   | 13917.0225             | -0.38                       |
| $2_{12}(\frac{3}{2}) \leftarrow 1_{01}(\frac{1}{2})$   | 13936.4944             | -1.42                       |
| $2_{12}(\frac{5}{2}) \leftarrow 1_{01}(\frac{3}{2})$   | 13925.8993             | 1.19                        |
| $2_{12}(\frac{3}{2}) \leftarrow 1_{01}(\frac{1}{2})$   | 13930.3192             | -0.22                       |
| $2_{12}(\frac{3}{2}) \leftarrow 1_{01}(\frac{1}{2})$   | 13914.3528             | 0.71                        |
| $2_{12}(\frac{1}{2}) \leftarrow 1_{01}(\frac{1}{2})$   | 13920.5295             | 1.01                        |
| $6_{06}(\frac{11}{2}) \leftarrow 5_{14}(\frac{9}{2})$  | 14065.9831             | 3.25                        |
| $5_{05}(\frac{13}{2}) \leftarrow 4_{14}(\frac{11}{2})$ | 14546.9137             | -8.21                       |
| $5_{05}(\frac{11}{2}) \leftarrow 4_{14}(\frac{9}{2})$  | 14546.8630             | 1.81                        |
| $4_{14}(\frac{11}{2}) \leftarrow 3_{13}(\frac{9}{2})$  | 15163.1317             | 1.75                        |
| $4_{14}(\frac{9}{2}) \leftarrow 3_{13}(\frac{7}{2})$   | 15153.7839             | -0.50                       |
| $4_{14}(\frac{9}{2}) \leftarrow 3_{13}(\frac{7}{2})$   | 15162.2058             | 1.71                        |
| $4_{14}(\frac{7}{2}) \leftarrow 3_{13}(\frac{5}{2})$   | 15161.5538             | 1.09                        |
| $4_{14}(\frac{5}{2}) \leftarrow 3_{13}(\frac{3}{2})$   | 15162.4728             | 0.55                        |
| $4_{04}(\frac{11}{2}) \leftarrow 3_{03}(\frac{9}{2})$  | 15718.0515             | 1.76                        |
| $4_{04}(\frac{9}{2}) \leftarrow 3_{03}(\frac{7}{2})$   | 15708.8313             | -1.10                       |
| $4_{04}(\frac{9}{2}) \leftarrow 3_{03}(\frac{7}{2})$   | 15717.8925             | 1.25                        |
| $4_{04}(\frac{7}{2}) \leftarrow 3_{03}(\frac{5}{2})$   | 15721.1290             | 1.36                        |
| $4_{04}(\frac{5}{2}) \leftarrow 3_{03}(\frac{3}{2})$   | 15726.1211             | -0.57                       |
| $4_{04}(\frac{7}{2}) \leftarrow 3_{03}(\frac{5}{2})$   | 15716.8925             | 1.06                        |

| Transition                                             | $\nu_{obs}/\text{MHz}$ | $\nu_{obs-pred}/\text{kHz}$ |
|--------------------------------------------------------|------------------------|-----------------------------|
| $4_{23}(\frac{11}{2}) \leftarrow 3_{22}(\frac{9}{2})$  | 15831.5722             | 3.64                        |
| $4_{23}(\frac{9}{2}) \leftarrow 3_{22}(\frac{7}{2})$   | 15827.9901             | -5.93                       |
| $4_{23}(\frac{7}{2}) \leftarrow 3_{22}(\frac{5}{2})$   | 15829.2495             | -2.57                       |
| $4_{23}(\frac{5}{2}) \leftarrow 3_{22}(\frac{3}{2})$   | 15832.8179             | 5.45                        |
| $4_{23}(\frac{9}{2}) \leftarrow 3_{22}(\frac{7}{2})$   | 15827.9991             | 0.98                        |
| $4_{23}(\frac{7}{2}) \leftarrow 3_{22}(\frac{5}{2})$   | 15829.2547             | -3.59                       |
| $4_{22}(\frac{11}{2}) \leftarrow 3_{21}(\frac{9}{2})$  | 15953.7295             | -1.18                       |
| $4_{22}(\frac{9}{2}) \leftarrow 3_{21}(\frac{7}{2})$   | 15950.3275             | -2.69                       |
| $4_{22}(\frac{7}{2}) \leftarrow 3_{21}(\frac{5}{2})$   | 15951.5262             | -0.65                       |
| $4_{22}(\frac{5}{2}) \leftarrow 3_{21}(\frac{3}{2})$   | 15954.9608             | -3.16                       |
| $4_{13}(\frac{11}{2}) \leftarrow 3_{12}(\frac{9}{2})$  | 16468.4731             | 1.20                        |
| $4_{13}(\frac{9}{2}) \leftarrow 3_{12}(\frac{7}{2})$   | 16467.5343             | 0.96                        |
| $4_{13}(\frac{7}{2}) \leftarrow 3_{12}(\frac{5}{2})$   | 16467.2954             | -0.06                       |
| $4_{13}(\frac{5}{2}) \leftarrow 3_{12}(\frac{3}{2})$   | 16468.2064             | 0.63                        |
| $3_{13}(\frac{9}{2}) \leftarrow 2_{02}(\frac{7}{2})$   | 17397.9885             | 0.57                        |
| $3_{13}(\frac{7}{2}) \leftarrow 2_{02}(\frac{5}{2})$   | 17389.5668             | -1.44                       |
| $3_{13}(\frac{7}{2}) \leftarrow 2_{02}(\frac{5}{2})$   | 17398.4905             | 0.50                        |
| $3_{13}(\frac{5}{2}) \leftarrow 2_{02}(\frac{3}{2})$   | 17402.4187             | -7.47                       |
| $3_{13}(\frac{5}{2}) \leftarrow 2_{02}(\frac{3}{2})$   | 17396.0028             | 0.18                        |
| $3_{13}(\frac{3}{2}) \leftarrow 2_{02}(\frac{1}{2})$   | 17404.4162             | -4.82                       |
| $3_{13}(\frac{3}{2}) \leftarrow 2_{02}(\frac{1}{2})$   | 17395.4675             | 0.53                        |
| $5_{23}(\frac{13}{2}) \leftarrow 5_{14}(\frac{11}{2})$ | 17506.9559             | -0.21                       |
| $5_{23}(\frac{11}{2}) \leftarrow 5_{14}(\frac{9}{2})$  | 17508.4861             | 0.59                        |
| $5_{23}(\frac{9}{2}) \leftarrow 5_{14}(\frac{7}{2})$   | 17508.0460             | -0.92                       |
| $5_{23}(\frac{7}{2}) \leftarrow 5_{14}(\frac{5}{2})$   | 17506.5209             | 0.54                        |

## B1. Assigned Transitions for *h-gg* 1-chloropropan-2-ol, <sup>35</sup>Cl Isotopomer

| Transition                                             | $\nu_{obs}/\text{MHz}$ | $\nu_{obs-pred}/\text{kHz}$ | Transition                                           | $\nu_{obs}/\text{MHz}$ | $\nu_{obs-pred}/\text{kHz}$ |
|--------------------------------------------------------|------------------------|-----------------------------|------------------------------------------------------|------------------------|-----------------------------|
| $1_{11}(\frac{5}{2}) \leftarrow 0_{00}(\frac{3}{2})$   | 8405.8684              | 1.32                        | $3_{21}(\frac{9}{2}) \leftarrow 3_{12}(\frac{9}{2})$ | 10218.0042             | -0.98                       |
| $1_{11}(\frac{3}{2}) \leftarrow 0_{00}(\frac{3}{2})$   | 8414.9758              | 8.37                        | $3_{21}(\frac{5}{2}) \leftarrow 3_{12}(\frac{5}{2})$ | 10222.6853             | -3.87                       |
| $1_{10}(\frac{3}{2}) \leftarrow 0_{00}(\frac{3}{2})$   | 8658.9523              | 2.58                        | $3_{21}(\frac{7}{2}) \leftarrow 3_{12}(\frac{7}{2})$ | 10226.8023             | -0.79                       |
| $1_{10}(\frac{5}{2}) \leftarrow 0_{00}(\frac{3}{2})$   | 8663.7173              | 3.75                        | $3_{03}(\frac{3}{2}) \leftarrow 2_{11}(\frac{1}{2})$ | 10602.0460             | -5.75                       |
| $1_{10}(\frac{1}{2}) \leftarrow 0_{00}(\frac{3}{2})$   | 8667.5961              | 5.03                        | $3_{03}(\frac{9}{2}) \leftarrow 2_{11}(\frac{7}{2})$ | 10606.9180             | -2.63                       |
| $2_{12}(\frac{5}{2}) \leftarrow 1_{11}(\frac{3}{2})$   | 9537.6255              | 5.42                        | $3_{03}(\frac{5}{2}) \leftarrow 2_{11}(\frac{3}{2})$ | 10607.9241             | -6.45                       |
| $2_{12}(\frac{7}{2}) \leftarrow 1_{11}(\frac{5}{2})$   | 9541.9369              | 11.79                       | $3_{03}(\frac{7}{2}) \leftarrow 2_{11}(\frac{5}{2})$ | 10613.0406             | -5.87                       |
| $2_{12}(\frac{3}{2}) \leftarrow 1_{11}(\frac{1}{2})$   | 9550.6087              | 8.66                        | $3_{22}(\frac{7}{2}) \leftarrow 3_{13}(\frac{7}{2})$ | 11681.4616             | -0.38                       |
| $4_{23}(\frac{5}{2}) \leftarrow 4_{13}(\frac{5}{2})$   | 9655.6031              | 4.29                        | $3_{22}(\frac{5}{2}) \leftarrow 3_{13}(\frac{5}{2})$ | 11683.2642             | 0.19                        |
| $4_{23}(\frac{11}{2}) \leftarrow 4_{13}(\frac{11}{2})$ | 9658.5879              | 1.09                        | $3_{22}(\frac{9}{2}) \leftarrow 3_{13}(\frac{9}{2})$ | 11685.3346             | 4.02                        |
| $4_{23}(\frac{7}{2}) \leftarrow 4_{13}(\frac{7}{2})$   | 9664.1651              | -0.06                       | $3_{22}(\frac{3}{2}) \leftarrow 3_{13}(\frac{3}{2})$ | 11687.1167             | -0.92                       |
| $4_{23}(\frac{9}{2}) \leftarrow 4_{13}(\frac{9}{2})$   | 9667.1958              | 0.75                        | $3_{21}(\frac{7}{2}) \leftarrow 3_{13}(\frac{7}{2})$ | 11747.4142             | 2.38                        |
| $2_{02}(\frac{3}{2}) \leftarrow 1_{01}(\frac{1}{2})$   | 9778.8852              | -0.04                       | $3_{21}(\frac{5}{2}) \leftarrow 3_{13}(\frac{5}{2})$ | 11749.7838             | -4.43                       |
| $2_{02}(\frac{5}{2}) \leftarrow 1_{01}(\frac{5}{2})$   | 9779.5536              | -3.94                       | $3_{21}(\frac{9}{2}) \leftarrow 3_{13}(\frac{9}{2})$ | 11752.5121             | 4.19                        |
| $2_{02}(\frac{1}{2}) \leftarrow 1_{01}(\frac{1}{2})$   | 9782.6981              | -0.66                       | $3_{21}(\frac{3}{2}) \leftarrow 3_{13}(\frac{3}{2})$ | 11754.8610             | -6.22                       |
| $2_{02}(\frac{7}{2}) \leftarrow 1_{01}(\frac{5}{2})$   | 9783.3682              | -4.43                       | $2_{12}(\frac{7}{2}) \leftarrow 1_{01}(\frac{5}{2})$ | 13048.6475             | 3.83                        |
| $2_{02}(\frac{5}{2}) \leftarrow 1_{01}(\frac{3}{2})$   | 9783.8940              | -1.50                       | $2_{12}(\frac{5}{2}) \leftarrow 1_{01}(\frac{3}{2})$ | 13057.7822             | 5.26                        |
| $4_{22}(\frac{5}{2}) \leftarrow 4_{13}(\frac{5}{2})$   | 9855.7461              | 5.89                        | $2_{12}(\frac{3}{2}) \leftarrow 1_{01}(\frac{1}{2})$ | 13046.6051             | 3.66                        |
| $4_{22}(\frac{7}{2}) \leftarrow 4_{13}(\frac{7}{2})$   | 9862.1410              | 1.21                        | $2_{12}(\frac{5}{2}) \leftarrow 1_{01}(\frac{5}{2})$ | 13053.4414             | 2.42                        |
| $4_{22}(\frac{9}{2}) \leftarrow 4_{13}(\frac{9}{2})$   | 9864.4075              | 2.55                        | $2_{12}(\frac{3}{2}) \leftarrow 1_{01}(\frac{3}{2})$ | 13054.3611             | 2.97                        |
| $2_{11}(\frac{5}{2}) \leftarrow 1_{10}(\frac{3}{2})$   | 10048.8930             | 8.56                        | $2_{12}(\frac{1}{2}) \leftarrow 1_{01}(\frac{1}{2})$ | 13041.8177             | 7.50                        |
| $2_{11}(\frac{7}{2}) \leftarrow 1_{10}(\frac{5}{2})$   | 10053.2310             | 6.89                        | $2_{12}(\frac{1}{2}) \leftarrow 1_{01}(\frac{3}{2})$ | 13049.5712             | 4.30                        |
| $3_{22}(\frac{5}{2}) \leftarrow 3_{12}(\frac{5}{2})$   | 10156.1639             | -1.04                       | $2_{11}(\frac{5}{2}) \leftarrow 1_{01}(\frac{5}{2})$ | 13808.6782             | -7.43                       |
| $3_{22}(\frac{7}{2}) \leftarrow 3_{12}(\frac{7}{2})$   | 10160.8496             | -3.65                       | $2_{11}(\frac{3}{2}) \leftarrow 1_{01}(\frac{1}{2})$ | 13811.7796             | -1.22                       |
| $3_{21}(\frac{3}{2}) \leftarrow 3_{12}(\frac{3}{2})$   | 10213.8892             | -4.24                       | $2_{11}(\frac{5}{2}) \leftarrow 1_{01}(\frac{3}{2})$ | 13813.0185             | -5.09                       |

| Transition                                            | $\nu_{obs}/\text{MHz}$ | $\nu_{obs-pred}/\text{kHz}$ |
|-------------------------------------------------------|------------------------|-----------------------------|
| $2_{11}(\frac{7}{2}) \leftarrow 1_{01}(\frac{5}{2})$  | 13817.7819             | -7.23                       |
| $2_{11}(\frac{3}{2}) \leftarrow 1_{01}(\frac{3}{2})$  | 13819.5341             | -3.42                       |
| $2_{11}(\frac{1}{2}) \leftarrow 1_{01}(\frac{1}{2})$  | 13820.8799             | -6.20                       |
| $3_{13}(\frac{3}{2}) \leftarrow 2_{12}(\frac{3}{2})$  | 14300.9271             | -2.40                       |
| $3_{13}(\frac{5}{2}) \leftarrow 2_{12}(\frac{5}{2})$  | 14301.3431             | -7.30                       |
| $3_{13}(\frac{7}{2}) \leftarrow 2_{12}(\frac{5}{2})$  | 14303.1554             | -4.20                       |
| $3_{13}(\frac{9}{2}) \leftarrow 2_{12}(\frac{7}{2})$  | 14304.0727             | -4.58                       |
| $3_{13}(\frac{5}{2}) \leftarrow 2_{12}(\frac{3}{2})$  | 14304.7644             | -4.81                       |
| $3_{13}(\frac{3}{2}) \leftarrow 2_{12}(\frac{1}{2})$  | 14305.7158             | -4.94                       |
| $3_{13}(\frac{7}{2}) \leftarrow 2_{12}(\frac{7}{2})$  | 14307.9490             | -5.92                       |
| $3_{03}(\frac{9}{2}) \leftarrow 2_{02}(\frac{7}{2})$  | 14641.3475             | 10.37                       |
| $3_{03}(\frac{7}{2}) \leftarrow 2_{02}(\frac{5}{2})$  | 14642.1813             | 6.74                        |
| $3_{03}(\frac{5}{2}) \leftarrow 2_{02}(\frac{3}{2})$  | 14640.8326             | 6.47                        |
| $3_{03}(\frac{3}{2}) \leftarrow 2_{02}(\frac{1}{2})$  | 14640.2455             | 6.41                        |
| $4_{04}(\frac{5}{2}) \leftarrow 3_{12}(\frac{3}{2})$  | 14994.3862             | 5.07                        |
| $4_{04}(\frac{11}{2}) \leftarrow 3_{12}(\frac{9}{2})$ | 14998.3158             | 5.13                        |
| $4_{04}(\frac{7}{2}) \leftarrow 3_{12}(\frac{5}{2})$  | 15002.2574             | -2.42                       |
| $4_{04}(\frac{9}{2}) \leftarrow 3_{12}(\frac{7}{2})$  | 15006.1934             | 1.46                        |
| $4_{04}(\frac{9}{2}) \leftarrow 3_{13}(\frac{7}{2})$  | 16526.8034             | 2.73                        |
| $4_{04}(\frac{11}{2}) \leftarrow 3_{13}(\frac{9}{2})$ | 16532.8177             | 4.31                        |
| $4_{04}(\frac{5}{2}) \leftarrow 3_{13}(\frac{3}{2})$  | 16535.3557             | 0.79                        |
| $3_{13}(\frac{3}{2}) \leftarrow 2_{02}(\frac{1}{2})$  | 17564.8290             | -3.18                       |
| $3_{13}(\frac{3}{2}) \leftarrow 2_{02}(\frac{3}{2})$  | 17568.6420             | -3.70                       |
| $3_{13}(\frac{9}{2}) \leftarrow 2_{02}(\frac{7}{2})$  | 17569.3420             | -6.32                       |
| $3_{13}(\frac{5}{2}) \leftarrow 2_{02}(\frac{3}{2})$  | 17572.4850             | -0.41                       |
| $3_{13}(\frac{7}{2}) \leftarrow 2_{02}(\frac{7}{2})$  | 17573.2290             | 3.05                        |
| $3_{13}(\frac{5}{2}) \leftarrow 2_{02}(\frac{5}{2})$  | 17575.2230             | -8.84                       |
| $3_{13}(\frac{7}{2}) \leftarrow 2_{02}(\frac{5}{2})$  | 17577.0350             | -6.05                       |

## B2. Assigned Transitions for *h-gg* 1-chloropropan-2-ol, <sup>37</sup>Cl Isotopomer

| Transition                                           | $\nu_{obs}/\text{MHz}$ | $\nu_{obs-pred}/\text{kHz}$ |
|------------------------------------------------------|------------------------|-----------------------------|
| $1_{11}(\frac{1}{2}) \leftarrow 0_{00}(\frac{3}{2})$ | 8341.8546              | -2.61                       |
| $1_{11}(\frac{5}{2}) \leftarrow 0_{00}(\frac{3}{2})$ | 8347.6061              | 3.34                        |
| $1_{11}(\frac{3}{2}) \leftarrow 0_{00}(\frac{3}{2})$ | 8354.7794              | -0.17                       |
| $1_{10}(\frac{3}{2}) \leftarrow 0_{00}(\frac{3}{2})$ | 8588.3707              | -4.16                       |
| $1_{10}(\frac{5}{2}) \leftarrow 0_{00}(\frac{3}{2})$ | 8592.0170              | 2.14                        |
| $1_{10}(\frac{1}{2}) \leftarrow 0_{00}(\frac{3}{2})$ | 8594.9736              | -0.40                       |
| $2_{12}(\frac{7}{2}) \leftarrow 1_{11}(\frac{5}{2})$ | 9332.3656              | 11.16                       |
| $3_{03}(\frac{5}{2}) \leftarrow 2_{11}(\frac{3}{2})$ | 10254.8666             | 3.08                        |
| $3_{03}(\frac{7}{2}) \leftarrow 2_{11}(\frac{5}{2})$ | 10258.7720             | 1.98                        |
| $2_{20}(\frac{1}{2}) \leftarrow 2_{11}(\frac{1}{2})$ | 10687.3717             | -4.09                       |
| $2_{20}(\frac{3}{2}) \leftarrow 2_{11}(\frac{1}{2})$ | 10690.4990             | 2.66                        |
| $2_{20}(\frac{1}{2}) \leftarrow 2_{11}(\frac{3}{2})$ | 10694.5455             | -3.16                       |
| $2_{20}(\frac{7}{2}) \leftarrow 2_{11}(\frac{7}{2})$ | 10694.7356             | 2.14                        |
| $2_{20}(\frac{3}{2}) \leftarrow 2_{11}(\frac{3}{2})$ | 10697.6733             | 4.10                        |
| $2_{20}(\frac{5}{2}) \leftarrow 2_{11}(\frac{3}{2})$ | 10699.9437             | -1.10                       |
| $2_{20}(\frac{5}{2}) \leftarrow 2_{11}(\frac{5}{2})$ | 10705.0775             | -3.71                       |
| $3_{03}(\frac{7}{2}) \leftarrow 2_{12}(\frac{5}{2})$ | 10977.7447             | -3.29                       |
| $3_{03}(\frac{5}{2}) \leftarrow 2_{12}(\frac{3}{2})$ | 10981.5899             | 0.11                        |
| $3_{03}(\frac{9}{2}) \leftarrow 2_{12}(\frac{7}{2})$ | 10984.0337             | -2.34                       |
| $3_{22}(\frac{7}{2}) \leftarrow 3_{13}(\frac{7}{2})$ | 11781.1036             | 1.30                        |
| $3_{22}(\frac{9}{2}) \leftarrow 3_{13}(\frac{9}{2})$ | 11784.0000             | 0.06                        |
| $3_{21}(\frac{7}{2}) \leftarrow 3_{13}(\frac{7}{2})$ | 11839.9966             | -0.16                       |
| $3_{21}(\frac{9}{2}) \leftarrow 3_{13}(\frac{9}{2})$ | 11843.7947             | 1.95                        |
| $2_{11}(\frac{3}{2}) \leftarrow 1_{01}(\frac{1}{2})$ | 13617.1338             | 6.58                        |
| $2_{11}(\frac{5}{2}) \leftarrow 1_{01}(\frac{3}{2})$ | 13618.3217             | 8.48                        |

| Transition                                            | $\nu_{obs}/\text{MHz}$ | $\nu_{obs-pred}/\text{kHz}$ |
|-------------------------------------------------------|------------------------|-----------------------------|
| $3_{13}(\frac{7}{2}) \leftarrow 2_{12}(\frac{5}{2})$  | 13989.9342             | -3.61                       |
| $3_{13}(\frac{9}{2}) \leftarrow 2_{12}(\frac{7}{2})$  | 13990.6950             | -0.92                       |
| $3_{13}(\frac{5}{2}) \leftarrow 2_{12}(\frac{3}{2})$  | 13991.1937             | -0.42                       |
| $3_{03}(\frac{5}{2}) \leftarrow 2_{02}(\frac{3}{2})$  | 14313.1719             | -4.08                       |
| $3_{03}(\frac{9}{2}) \leftarrow 2_{02}(\frac{7}{2})$  | 14313.6835             | -7.22                       |
| $3_{03}(\frac{7}{2}) \leftarrow 2_{02}(\frac{5}{2})$  | 14314.2088             | -7.07                       |
| $4_{04}(\frac{11}{2}) \leftarrow 3_{12}(\frac{9}{2})$ | 14567.1014             | 0.13                        |
| $4_{04}(\frac{7}{2}) \leftarrow 3_{12}(\frac{5}{2})$  | 14570.0849             | 5.07                        |
| $4_{04}(\frac{9}{2}) \leftarrow 3_{12}(\frac{7}{2})$  | 14573.1186             | 3.65                        |
| $3_{13}(\frac{9}{2}) \leftarrow 2_{02}(\frac{7}{2})$  | 17320.3521             | 1.50                        |
| $3_{13}(\frac{5}{2}) \leftarrow 2_{02}(\frac{3}{2})$  | 17322.7815             | 1.19                        |
| $3_{13}(\frac{7}{2}) \leftarrow 2_{02}(\frac{7}{2})$  | 17323.2527             | -2.91                       |
| $3_{13}(\frac{5}{2}) \leftarrow 2_{02}(\frac{5}{2})$  | 17325.0465             | -3.62                       |
| $3_{13}(\frac{7}{2}) \leftarrow 2_{02}(\frac{5}{2})$  | 17326.4046             | -1.10                       |

### C1. Assigned Transitions for *g-ga* 2-chloropropan-1-ol, <sup>35</sup>Cl Isotopomer

| Transition                                             | $\nu_{obs}/\text{MHz}$ | $\nu_{obs-pred}/\text{kHz}$ | Transition                                             | $\nu_{obs}/\text{MHz}$ | $\nu_{obs-pred}/\text{kHz}$ |
|--------------------------------------------------------|------------------------|-----------------------------|--------------------------------------------------------|------------------------|-----------------------------|
| $1_{01}(\frac{1}{2}) \leftarrow 0_{00}(\frac{3}{2})$   | 5382.5329              | -2.53                       | $6_{42}(\frac{15}{2}) \leftarrow 6_{33}(\frac{15}{2})$ | 9514.1241              | -0.22                       |
| $1_{01}(\frac{5}{2}) \leftarrow 0_{00}(\frac{3}{2})$   | 5385.3275              | 0.45                        | $6_{42}(\frac{11}{2}) \leftarrow 6_{33}(\frac{11}{2})$ | 9510.6499              | -0.97                       |
| $1_{01}(\frac{3}{2}) \leftarrow 0_{00}(\frac{3}{2})$   | 5388.7003              | -0.58                       | $2_{12}(\frac{7}{2}) \leftarrow 1_{11}(\frac{5}{2})$   | 9538.2181              | -0.42                       |
| $4_{22}(\frac{11}{2}) \leftarrow 4_{13}(\frac{11}{2})$ | 6628.1027              | 1.15                        | $2_{12}(\frac{5}{2}) \leftarrow 1_{11}(\frac{3}{2})$   | 9541.6082              | -0.46                       |
| $4_{22}(\frac{9}{2}) \leftarrow 4_{13}(\frac{9}{2})$   | 6634.5066              | 0.82                        | $2_{12}(\frac{3}{2}) \leftarrow 1_{11}(\frac{1}{2})$   | 9527.8848              | 0.48                        |
| $4_{22}(\frac{7}{2}) \leftarrow 4_{13}(\frac{7}{2})$   | 6632.2604              | 0.77                        | $2_{12}(\frac{5}{2}) \leftarrow 1_{11}(\frac{5}{2})$   | 9531.2388              | -1.80                       |
| $4_{22}(\frac{5}{2}) \leftarrow 4_{13}(\frac{5}{2})$   | 6625.8507              | -1.85                       | $2_{12}(\frac{3}{2}) \leftarrow 1_{11}(\frac{3}{2})$   | 9546.6094              | 0.06                        |
| $1_{11}(\frac{1}{2}) \leftarrow 0_{00}(\frac{3}{2})$   | 6757.0533              | -0.49                       | $2_{12}(\frac{1}{2}) \leftarrow 1_{11}(\frac{1}{2})$   | 9534.8602              | 2.56                        |
| $1_{11}(\frac{5}{2}) \leftarrow 0_{00}(\frac{3}{2})$   | 6748.6977              | 0.88                        | $3_{31}(\frac{9}{2}) \leftarrow 3_{22}(\frac{9}{2})$   | 10176.2911             | 3.74                        |
| $1_{11}(\frac{3}{2}) \leftarrow 0_{00}(\frac{3}{2})$   | 6738.3280              | -0.76                       | $3_{31}(\frac{7}{2}) \leftarrow 3_{22}(\frac{7}{2})$   | 10173.3287             | -1.86                       |
| $4_{31}(\frac{11}{2}) \leftarrow 4_{22}(\frac{11}{2})$ | 7120.2783              | 0.01                        | $3_{31}(\frac{5}{2}) \leftarrow 3_{22}(\frac{5}{2})$   | 10174.7018             | -6.68                       |
| $4_{31}(\frac{7}{2}) \leftarrow 4_{22}(\frac{7}{2})$   | 7116.6741              | 2.89                        | $3_{31}(\frac{3}{2}) \leftarrow 3_{22}(\frac{3}{2})$   | 10177.6697             | -2.87                       |
| $4_{31}(\frac{5}{2}) \leftarrow 4_{22}(\frac{5}{2})$   | 7122.2256              | -0.92                       | $2_{02}(\frac{7}{2}) \leftarrow 1_{01}(\frac{5}{2})$   | 10232.8378             | 1.24                        |
| $3_{12}(\frac{9}{2}) \leftarrow 3_{03}(\frac{9}{2})$   | 7467.2992              | 1.79                        | $2_{02}(\frac{5}{2}) \leftarrow 1_{01}(\frac{3}{2})$   | 10227.6947             | 0.53                        |
| $3_{12}(\frac{7}{2}) \leftarrow 3_{03}(\frac{7}{2})$   | 7481.7922              | -0.69                       | $2_{02}(\frac{3}{2}) \leftarrow 1_{01}(\frac{1}{2})$   | 10235.1433             | 1.53                        |
| $3_{12}(\frac{5}{2}) \leftarrow 3_{03}(\frac{5}{2})$   | 7475.0182              | -1.16                       | $2_{02}(\frac{5}{2}) \leftarrow 1_{01}(\frac{5}{2})$   | 10231.0675             | -0.51                       |
| $3_{12}(\frac{3}{2}) \leftarrow 3_{03}(\frac{3}{2})$   | 7460.5255              | -1.37                       | $2_{02}(\frac{3}{2}) \leftarrow 1_{01}(\frac{3}{2})$   | 10228.9762             | -0.11                       |
| $3_{30}(\frac{9}{2}) \leftarrow 3_{21}(\frac{9}{2})$   | 8097.2131              | 4.13                        | $2_{02}(\frac{1}{2}) \leftarrow 1_{01}(\frac{1}{2})$   | 10236.8855             | 0.56                        |
| $3_{30}(\frac{7}{2}) \leftarrow 3_{21}(\frac{7}{2})$   | 8086.2896              | 4.35                        | $2_{12}(\frac{7}{2}) \leftarrow 1_{01}(\frac{5}{2})$   | 10901.5895             | 1.20                        |
| $3_{30}(\frac{7}{2}) \leftarrow 3_{21}(\frac{5}{2})$   | 8090.6113              | -0.18                       | $2_{12}(\frac{5}{2}) \leftarrow 1_{01}(\frac{3}{2})$   | 10891.2362             | -0.34                       |
| $3_{30}(\frac{5}{2}) \leftarrow 3_{21}(\frac{5}{2})$   | 8091.3875              | 4.29                        | $2_{12}(\frac{3}{2}) \leftarrow 1_{01}(\frac{1}{2})$   | 10902.4034             | 0.72                        |
| $3_{30}(\frac{3}{2}) \leftarrow 3_{21}(\frac{3}{2})$   | 8102.3142              | -1.17                       | $2_{12}(\frac{5}{2}) \leftarrow 1_{01}(\frac{5}{2})$   | 10894.6094             | -0.98                       |
| $3_{22}(\frac{9}{2}) \leftarrow 3_{13}(\frac{9}{2})$   | 9919.0531              | 1.57                        | $2_{12}(\frac{3}{2}) \leftarrow 1_{01}(\frac{3}{2})$   | 10896.2369             | -0.32                       |
| $3_{22}(\frac{7}{2}) \leftarrow 3_{13}(\frac{7}{2})$   | 9926.4843              | -3.72                       | $4_{32}(\frac{5}{2}) \leftarrow 4_{23}(\frac{5}{2})$   | 11367.8468             | -1.29                       |
| $3_{22}(\frac{5}{2}) \leftarrow 3_{13}(\frac{5}{2})$   | 9923.0122              | 4.42                        | $4_{32}(\frac{7}{2}) \leftarrow 4_{23}(\frac{7}{2})$   | 11369.2287             | 0.47                        |

| Transition                                             | $\nu_{obs}/\text{MHz}$ | $\nu_{obs-pred}/\text{kHz}$ | Transition                                             | $\nu_{obs}/\text{MHz}$ | $\nu_{obs-pred}/\text{kHz}$ |
|--------------------------------------------------------|------------------------|-----------------------------|--------------------------------------------------------|------------------------|-----------------------------|
| $4_{13}(\frac{11}{2}) \leftarrow 4_{04}(\frac{11}{2})$ | 11392.6143             | 1.23                        | $6_{24}(\frac{13}{2}) \leftarrow 6_{15}(\frac{13}{2})$ | 14005.2714             | -0.22                       |
| $4_{13}(\frac{9}{2}) \leftarrow 4_{04}(\frac{9}{2})$   | 11405.3889             | 2.14                        | $6_{24}(\frac{11}{2}) \leftarrow 6_{15}(\frac{11}{2})$ | 14003.1344             | -0.67                       |
| $4_{13}(\frac{7}{2}) \leftarrow 4_{04}(\frac{7}{2})$   | 11400.9016             | 0.05                        | $6_{24}(\frac{9}{2}) \leftarrow 6_{15}(\frac{9}{2})$   | 13994.1029             | 1.05                        |
| $4_{13}(\frac{5}{2}) \leftarrow 4_{04}(\frac{5}{2})$   | 11388.1356             | 3.26                        | $3_{13}(\frac{9}{2}) \leftarrow 2_{12}(\frac{7}{2})$   | 14019.7772             | 1.73                        |
| $2_{11}(\frac{7}{2}) \leftarrow 1_{10}(\frac{5}{2})$   | 12004.1132             | 1.46                        | $3_{13}(\frac{7}{2}) \leftarrow 2_{12}(\frac{5}{2})$   | 14019.3278             | 1.94                        |
| $2_{11}(\frac{5}{2}) \leftarrow 1_{10}(\frac{3}{2})$   | 12007.5152             | 2.13                        | $3_{13}(\frac{5}{2}) \leftarrow 2_{12}(\frac{3}{2})$   | 14017.7990             | -0.30                       |
| $2_{11}(\frac{3}{2}) \leftarrow 1_{10}(\frac{1}{2})$   | 12012.6482             | 0.54                        | $3_{13}(\frac{3}{2}) \leftarrow 2_{12}(\frac{1}{2})$   | 14018.2681             | 1.01                        |
| $2_{11}(\frac{5}{2}) \leftarrow 1_{10}(\frac{5}{2})$   | 12014.5083             | 0.77                        | $3_{13}(\frac{5}{2}) \leftarrow 2_{12}(\frac{5}{2})$   | 14022.8008             | 0.82                        |
| $2_{11}(\frac{3}{2}) \leftarrow 1_{10}(\frac{3}{2})$   | 12000.0872             | -1.14                       | $3_{13}(\frac{7}{2}) \leftarrow 2_{12}(\frac{7}{2})$   | 14012.3467             | -1.24                       |
| $2_{11}(\frac{1}{2}) \leftarrow 1_{10}(\frac{1}{2})$   | 12002.2554             | 1.67                        | $3_{13}(\frac{3}{2}) \leftarrow 2_{12}(\frac{3}{2})$   | 14025.2385             | -1.92                       |
| $4_{40}(\frac{11}{2}) \leftarrow 4_{31}(\frac{11}{2})$ | 12278.8858             | 1.87                        | $3_{03}(\frac{9}{2}) \leftarrow 2_{02}(\frac{7}{2})$   | 14452.1320             | 1.73                        |
| $4_{40}(\frac{9}{2}) \leftarrow 4_{31}(\frac{9}{2})$   | 12270.0895             | -0.61                       | $3_{03}(\frac{7}{2}) \leftarrow 2_{02}(\frac{5}{2})$   | 14448.0601             | 0.78                        |
| $4_{40}(\frac{7}{2}) \leftarrow 4_{31}(\frac{7}{2})$   | 12273.1662             | -0.53                       | $3_{03}(\frac{5}{2}) \leftarrow 2_{02}(\frac{3}{2})$   | 14449.5114             | 0.62                        |
| $4_{40}(\frac{5}{2}) \leftarrow 4_{31}(\frac{5}{2})$   | 12281.9773             | -1.28                       | $3_{03}(\frac{3}{2}) \leftarrow 2_{02}(\frac{1}{2})$   | 14453.6174             | -0.03                       |
| $4_{23}(\frac{5}{2}) \leftarrow 4_{14}(\frac{5}{2})$   | 12694.8195             | -1.60                       | $3_{03}(\frac{7}{2}) \leftarrow 2_{02}(\frac{7}{2})$   | 14446.2900             | -0.77                       |
| $4_{23}(\frac{11}{2}) \leftarrow 4_{14}(\frac{11}{2})$ | 12697.7769             | 0.66                        | $3_{03}(\frac{5}{2}) \leftarrow 2_{02}(\frac{5}{2})$   | 14450.7931             | 0.18                        |
| $4_{23}(\frac{9}{2}) \leftarrow 4_{14}(\frac{9}{2})$   | 12706.2097             | 0.91                        | $3_{03}(\frac{3}{2}) \leftarrow 2_{02}(\frac{3}{2})$   | 14455.3599             | -0.70                       |
| $4_{23}(\frac{7}{2}) \leftarrow 4_{14}(\frac{7}{2})$   | 12703.2444             | -0.59                       | $3_{13}(\frac{9}{2}) \leftarrow 2_{02}(\frac{7}{2})$   | 14688.5291             | 1.89                        |
| $4_{23}(\frac{5}{2}) \leftarrow 4_{14}(\frac{5}{2})$   | 12694.8225             | 1.40                        | $3_{13}(\frac{7}{2}) \leftarrow 2_{02}(\frac{5}{2})$   | 14682.8685             | 0.28                        |
| $4_{41}(\frac{11}{2}) \leftarrow 4_{32}(\frac{11}{2})$ | 13243.5704             | 1.83                        | $3_{13}(\frac{5}{2}) \leftarrow 2_{02}(\frac{3}{2})$   | 14685.0629             | 2.69                        |
| $4_{41}(\frac{9}{2}) \leftarrow 4_{32}(\frac{9}{2})$   | 13238.7102             | 0.45                        | $3_{13}(\frac{3}{2}) \leftarrow 2_{02}(\frac{1}{2})$   | 14690.7571             | -1.06                       |
| $4_{41}(\frac{7}{2}) \leftarrow 4_{32}(\frac{7}{2})$   | 13240.4116             | -0.07                       | $3_{13}(\frac{7}{2}) \leftarrow 2_{02}(\frac{7}{2})$   | 14681.0987             | -0.98                       |
| $4_{41}(\frac{5}{2}) \leftarrow 4_{32}(\frac{5}{2})$   | 13245.2740             | -1.87                       | $3_{13}(\frac{5}{2}) \leftarrow 2_{02}(\frac{5}{2})$   | 14686.3421             | -0.25                       |
| $3_{03}(\frac{9}{2}) \leftarrow 2_{12}(\frac{7}{2})$   | 13783.3804             | 1.86                        | $3_{13}(\frac{3}{2}) \leftarrow 2_{02}(\frac{3}{2})$   | 14692.4991             | -2.23                       |
| $3_{03}(\frac{7}{2}) \leftarrow 2_{12}(\frac{5}{2})$   | 13784.5192             | 2.25                        | $5_{24}(\frac{13}{2}) \leftarrow 5_{15}(\frac{13}{2})$ | 15916.1220             | -0.30                       |
| $3_{03}(\frac{5}{2}) \leftarrow 2_{12}(\frac{3}{2})$   | 13782.2503             | 0.43                        | $5_{24}(\frac{11}{2}) \leftarrow 5_{15}(\frac{11}{2})$ | 15924.3203             | -0.15                       |
| $3_{03}(\frac{3}{2}) \leftarrow 2_{12}(\frac{1}{2})$   | 13781.1279             | 1.53                        | $5_{24}(\frac{9}{2}) \leftarrow 5_{15}(\frac{9}{2})$   | 15922.0001             | -1.26                       |
| $3_{03}(\frac{7}{2}) \leftarrow 2_{12}(\frac{7}{2})$   | 13777.5385             | -0.53                       | $5_{24}(\frac{7}{2}) \leftarrow 5_{15}(\frac{7}{2})$   | 15913.8150             | -0.38                       |
| $3_{03}(\frac{5}{2}) \leftarrow 2_{12}(\frac{5}{2})$   | 13787.2510             | 0.45                        | $2_{21}(\frac{5}{2}) \leftarrow 1_{10}(\frac{3}{2})$   | 16079.4759             | 0.97                        |
| $3_{03}(\frac{3}{2}) \leftarrow 2_{12}(\frac{3}{2})$   | 13788.0993             | -0.39                       | $2_{21}(\frac{3}{2}) \leftarrow 1_{10}(\frac{1}{2})$   | 16094.4566             | 0.53                        |
| $6_{24}(\frac{15}{2}) \leftarrow 6_{15}(\frac{15}{2})$ | 13996.2368             | -0.35                       | $2_{21}(\frac{5}{2}) \leftarrow 1_{10}(\frac{5}{2})$   | 16086.4679             | -1.49                       |

| Transition                                           | $\nu_{obs}/\text{MHz}$ | $\nu_{obs-pred}/\text{kHz}$ |
|------------------------------------------------------|------------------------|-----------------------------|
| $2_{21}(\frac{3}{2}) \leftarrow 1_{10}(\frac{3}{2})$ | 16081.8944             | -2.34                       |
| $2_{21}(\frac{1}{2}) \leftarrow 1_{10}(\frac{1}{2})$ | 16097.9046             | -1.13                       |
| $3_{22}(\frac{9}{2}) \leftarrow 2_{21}(\frac{7}{2})$ | 16156.9624             | 1.80                        |
| $3_{22}(\frac{7}{2}) \leftarrow 2_{21}(\frac{5}{2})$ | 16160.3675             | 3.40                        |
| $3_{22}(\frac{5}{2}) \leftarrow 2_{21}(\frac{3}{2})$ | 16157.9375             | 1.33                        |
| $3_{22}(\frac{3}{2}) \leftarrow 2_{21}(\frac{1}{2})$ | 16154.5015             | 1.82                        |
| $3_{22}(\frac{7}{2}) \leftarrow 2_{21}(\frac{7}{2})$ | 16156.9621             | -7.47                       |
| $3_{12}(\frac{9}{2}) \leftarrow 2_{11}(\frac{7}{2})$ | 17554.5604             | -1.33                       |
| $3_{12}(\frac{7}{2}) \leftarrow 2_{11}(\frac{5}{2})$ | 17552.8179             | -4.01                       |
| $3_{12}(\frac{5}{2}) \leftarrow 2_{11}(\frac{3}{2})$ | 17556.2050             | -1.72                       |
| $3_{12}(\frac{3}{2}) \leftarrow 2_{11}(\frac{1}{2})$ | 17557.9542             | -3.78                       |
| $3_{12}(\frac{7}{2}) \leftarrow 2_{11}(\frac{7}{2})$ | 17563.2140             | -3.70                       |
| $3_{12}(\frac{3}{2}) \leftarrow 2_{11}(\frac{3}{2})$ | 17547.5587             | -5.35                       |
| $2_{20}(\frac{7}{2}) \leftarrow 1_{11}(\frac{5}{2})$ | 17858.9519             | 1.63                        |
| $2_{20}(\frac{5}{2}) \leftarrow 1_{11}(\frac{3}{2})$ | 17871.1040             | 0.74                        |
| $2_{20}(\frac{3}{2}) \leftarrow 1_{11}(\frac{1}{2})$ | 17851.0983             | -1.11                       |
| $2_{20}(\frac{5}{2}) \leftarrow 1_{11}(\frac{5}{2})$ | 17860.7339             | -1.31                       |
| $2_{20}(\frac{3}{2}) \leftarrow 1_{11}(\frac{3}{2})$ | 17869.8230             | -1.43                       |
| $2_{20}(\frac{1}{2}) \leftarrow 1_{11}(\frac{1}{2})$ | 17849.3695             | -2.02                       |
| $3_{21}(\frac{9}{2}) \leftarrow 2_{20}(\frac{7}{2})$ | 17862.5791             | 3.04                        |
| $3_{21}(\frac{7}{2}) \leftarrow 2_{20}(\frac{5}{2})$ | 17870.0599             | 3.09                        |
| $3_{21}(\frac{5}{2}) \leftarrow 2_{20}(\frac{3}{2})$ | 17867.0119             | 2.49                        |

## C2. Assigned Transitions for *g-ga* 2-chloropropan-1-ol, <sup>37</sup>Cl Isotopomer

| Transition                                           | $\nu_{obs}/\text{MHz}$ | $\nu_{obs-pred}/\text{kHz}$ |
|------------------------------------------------------|------------------------|-----------------------------|
| $1_{01}(\frac{5}{2}) \leftarrow 0_{00}(\frac{3}{2})$ | 5314.8458              | 0.85                        |
| $1_{01}(\frac{3}{2}) \leftarrow 0_{00}(\frac{3}{2})$ | 5316.8622              | 0.89                        |
| $1_{11}(\frac{1}{2}) \leftarrow 0_{00}(\frac{3}{2})$ | 6640.1573              | -1.20                       |
| $1_{11}(\frac{3}{2}) \leftarrow 0_{00}(\frac{3}{2})$ | 6626.5370              | -0.39                       |
| $1_{11}(\frac{5}{2}) \leftarrow 0_{00}(\frac{3}{2})$ | 6634.0791              | 2.32                        |
| $2_{02}(\frac{7}{2}) \leftarrow 1_{11}(\frac{5}{2})$ | 8766.5975              | -1.42                       |
| $2_{12}(\frac{7}{2}) \leftarrow 1_{11}(\frac{5}{2})$ | 9404.3835              | 0.62                        |
| $2_{12}(\frac{5}{2}) \leftarrow 1_{11}(\frac{3}{2})$ | 9406.4079              | 0.14                        |
| $2_{12}(\frac{3}{2}) \leftarrow 1_{11}(\frac{1}{2})$ | 9396.7381              | 1.41                        |
| $2_{12}(\frac{5}{2}) \leftarrow 1_{11}(\frac{5}{2})$ | 9398.8675              | -0.87                       |
| $2_{12}(\frac{3}{2}) \leftarrow 1_{11}(\frac{3}{2})$ | 9410.3560              | -1.80                       |
| $2_{12}(\frac{1}{2}) \leftarrow 1_{11}(\frac{1}{2})$ | 9402.2462              | 0.24                        |
| $3_{22}(\frac{9}{2}) \leftarrow 3_{13}(\frac{9}{2})$ | 9758.1052              | 0.17                        |
| $3_{22}(\frac{7}{2}) \leftarrow 3_{13}(\frac{7}{2})$ | 9764.0906              | -1.78                       |
| $3_{22}(\frac{5}{2}) \leftarrow 3_{13}(\frac{5}{2})$ | 9761.2935              | 2.22                        |
| $3_{22}(\frac{3}{2}) \leftarrow 3_{13}(\frac{3}{2})$ | 9755.3104              | 0.52                        |
| $3_{31}(\frac{9}{2}) \leftarrow 3_{22}(\frac{9}{2})$ | 9942.8494              | 2.40                        |
| $3_{31}(\frac{7}{2}) \leftarrow 3_{22}(\frac{7}{2})$ | 9941.2724              | -2.67                       |
| $3_{31}(\frac{5}{2}) \leftarrow 3_{22}(\frac{5}{2})$ | 9942.0076              | 0.36                        |
| $3_{31}(\frac{3}{2}) \leftarrow 3_{22}(\frac{3}{2})$ | 9943.5846              | -0.25                       |
| $2_{12}(\frac{7}{2}) \leftarrow 1_{01}(\frac{5}{2})$ | 10723.6152             | 0.49                        |
| $2_{12}(\frac{5}{2}) \leftarrow 1_{01}(\frac{3}{2})$ | 10716.0857             | 1.86                        |
| $2_{12}(\frac{3}{2}) \leftarrow 1_{01}(\frac{1}{2})$ | 10723.7288             | -0.62                       |
| $2_{12}(\frac{5}{2}) \leftarrow 1_{01}(\frac{5}{2})$ | 10718.1000             | -0.20                       |
| $2_{12}(\frac{3}{2}) \leftarrow 1_{01}(\frac{3}{2})$ | 10720.0341             | 0.22                        |

| Transition                                           | $\nu_{obs}/\text{MHz}$ | $\nu_{obs-pred}/\text{kHz}$ |
|------------------------------------------------------|------------------------|-----------------------------|
| $2_{12}(\frac{1}{2}) \leftarrow 1_{01}(\frac{1}{2})$ | 10729.2389             | 0.21                        |
| $2_{12}(\frac{3}{2}) \leftarrow 1_{01}(\frac{5}{2})$ | 10722.0481             | -2.14                       |
| $2_{12}(\frac{1}{2}) \leftarrow 1_{01}(\frac{3}{2})$ | 10725.5418             | -1.34                       |
| $2_{02}(\frac{7}{2}) \leftarrow 1_{01}(\frac{5}{2})$ | 10085.8317             | 0.95                        |
| $2_{02}(\frac{5}{2}) \leftarrow 1_{01}(\frac{3}{2})$ | 10081.9663             | 0.64                        |
| $2_{02}(\frac{3}{2}) \leftarrow 1_{01}(\frac{1}{2})$ | 10086.9944             | 0.21                        |
| $2_{02}(\frac{5}{2}) \leftarrow 1_{01}(\frac{5}{2})$ | 10083.9813             | -0.72                       |
| $2_{02}(\frac{3}{2}) \leftarrow 1_{01}(\frac{3}{2})$ | 10083.2989             | 0.25                        |
| $2_{02}(\frac{1}{2}) \leftarrow 1_{01}(\frac{1}{2})$ | 10088.8282             | 0.03                        |
| $4_{13}(\frac{9}{2}) \leftarrow 4_{04}(\frac{9}{2})$ | 11298.5508             | 0.68                        |
| $4_{13}(\frac{7}{2}) \leftarrow 4_{04}(\frac{7}{2})$ | 11295.1697             | -0.10                       |
| $4_{13}(\frac{5}{2}) \leftarrow 4_{04}(\frac{5}{2})$ | 11285.5492             | -0.63                       |
| $2_{11}(\frac{7}{2}) \leftarrow 1_{10}(\frac{5}{2})$ | 11855.5931             | 0.76                        |
| $2_{11}(\frac{5}{2}) \leftarrow 1_{10}(\frac{3}{2})$ | 11857.6311             | 1.22                        |
| $2_{11}(\frac{3}{2}) \leftarrow 1_{10}(\frac{1}{2})$ | 11862.1546             | 0.06                        |
| $2_{11}(\frac{5}{2}) \leftarrow 1_{10}(\frac{5}{2})$ | 11863.1529             | -0.16                       |
| $2_{11}(\frac{1}{2}) \leftarrow 1_{10}(\frac{1}{2})$ | 11854.5938             | -0.47                       |
| $2_{11}(\frac{3}{2}) \leftarrow 1_{10}(\frac{3}{2})$ | 11852.2291             | 0.00                        |
| $2_{11}(\frac{1}{2}) \leftarrow 1_{10}(\frac{3}{2})$ | 11844.6680             | -0.83                       |
| $3_{03}(\frac{9}{2}) \leftarrow 2_{12}(\frac{7}{2})$ | 13595.0903             | 2.25                        |
| $3_{03}(\frac{7}{2}) \leftarrow 2_{12}(\frac{5}{2})$ | 13595.7260             | 2.28                        |
| $3_{03}(\frac{5}{2}) \leftarrow 2_{12}(\frac{3}{2})$ | 13594.0573             | 0.95                        |
| $3_{03}(\frac{3}{2}) \leftarrow 2_{12}(\frac{1}{2})$ | 13593.4313             | -0.70                       |
| $3_{03}(\frac{7}{2}) \leftarrow 2_{12}(\frac{7}{2})$ | 13590.2084             | -0.81                       |
| $3_{03}(\frac{5}{2}) \leftarrow 2_{12}(\frac{5}{2})$ | 13598.0050             | -1.39                       |

| Transition                                           | $\nu_{obs}/\text{MHz}$ | $\nu_{obs-pred}/\text{kHz}$ |
|------------------------------------------------------|------------------------|-----------------------------|
| $3_{03}(\frac{3}{2}) \leftarrow 2_{12}(\frac{3}{2})$ | 13598.9394             | -1.86                       |
| $3_{13}(\frac{9}{2}) \leftarrow 2_{12}(\frac{7}{2})$ | 13816.4236             | 1.84                        |
| $3_{13}(\frac{7}{2}) \leftarrow 2_{12}(\frac{5}{2})$ | 13815.9542             | -0.17                       |
| $3_{13}(\frac{5}{2}) \leftarrow 2_{12}(\frac{3}{2})$ | 13814.8024             | 0.70                        |
| $3_{03}(\frac{9}{2}) \leftarrow 2_{02}(\frac{7}{2})$ | 14232.8738             | 1.78                        |
| $3_{03}(\frac{7}{2}) \leftarrow 2_{02}(\frac{5}{2})$ | 14229.8423             | 0.40                        |
| $3_{03}(\frac{5}{2}) \leftarrow 2_{02}(\frac{3}{2})$ | 14230.7921             | 0.52                        |
| $3_{03}(\frac{3}{2}) \leftarrow 2_{02}(\frac{1}{2})$ | 14233.8424             | -0.11                       |
| $3_{03}(\frac{7}{2}) \leftarrow 2_{02}(\frac{7}{2})$ | 14227.9927             | -0.47                       |
| $3_{03}(\frac{5}{2}) \leftarrow 2_{02}(\frac{5}{2})$ | 14232.1236             | -0.98                       |
| $3_{13}(\frac{9}{2}) \leftarrow 2_{02}(\frac{7}{2})$ | 14454.2059             | 0.18                        |
| $3_{13}(\frac{7}{2}) \leftarrow 2_{02}(\frac{5}{2})$ | 14450.0738             | 1.25                        |
| $3_{13}(\frac{5}{2}) \leftarrow 2_{02}(\frac{3}{2})$ | 14451.5372             | 0.28                        |
| $3_{13}(\frac{3}{2}) \leftarrow 2_{02}(\frac{1}{2})$ | 14455.6906             | -1.75                       |
| $3_{13}(\frac{7}{2}) \leftarrow 2_{02}(\frac{7}{2})$ | 14448.2223             | -1.52                       |
| $3_{13}(\frac{5}{2}) \leftarrow 2_{02}(\frac{5}{2})$ | 14452.8690             | -0.92                       |
| $3_{13}(\frac{3}{2}) \leftarrow 2_{02}(\frac{3}{2})$ | 14457.5261             | -0.23                       |
| $2_{21}(\frac{7}{2}) \leftarrow 1_{10}(\frac{5}{2})$ | 15810.2603             | 3.03                        |
| $2_{21}(\frac{5}{2}) \leftarrow 1_{10}(\frac{3}{2})$ | 15802.7038             | 1.66                        |
| $2_{21}(\frac{3}{2}) \leftarrow 1_{10}(\frac{1}{2})$ | 15814.0762             | -0.67                       |
| $2_{21}(\frac{5}{2}) \leftarrow 1_{10}(\frac{5}{2})$ | 15808.2261             | 0.78                        |
| $2_{21}(\frac{3}{2}) \leftarrow 1_{10}(\frac{3}{2})$ | 15804.1509             | -0.54                       |
| $2_{21}(\frac{1}{2}) \leftarrow 1_{10}(\frac{1}{2})$ | 15816.1442             | -1.49                       |
| $3_{22}(\frac{9}{2}) \leftarrow 2_{21}(\frac{7}{2})$ | 15945.0963             | 0.33                        |
| $3_{22}(\frac{7}{2}) \leftarrow 2_{21}(\frac{5}{2})$ | 15947.1329             | -0.46                       |
| $3_{22}(\frac{5}{2}) \leftarrow 2_{21}(\frac{3}{2})$ | 15945.6794             | -0.93                       |
| $3_{22}(\frac{3}{2}) \leftarrow 2_{21}(\frac{1}{2})$ | 15943.6196             | 0.07                        |
| $3_{12}(\frac{9}{2}) \leftarrow 2_{11}(\frac{7}{2})$ | 17323.8490             | 0.66                        |
| $3_{12}(\frac{7}{2}) \leftarrow 2_{11}(\frac{5}{2})$ | 17322.3972             | -0.10                       |
| $3_{12}(\frac{5}{2}) \leftarrow 2_{11}(\frac{3}{2})$ | 17324.9448             | -0.99                       |
| $3_{12}(\frac{3}{2}) \leftarrow 2_{11}(\frac{1}{2})$ | 17326.4079             | 1.38                        |

| Transition                                            | $\nu_{obs}/\text{MHz}$ | $\nu_{obs-pred}/\text{kHz}$ |
|-------------------------------------------------------|------------------------|-----------------------------|
| $3_{12}(\frac{7}{2}) \leftarrow 2_{11}(\frac{7}{2})$  | 17329.9554             | -2.63                       |
| $2_{20}(\frac{5}{2}) \leftarrow 1_{11}(\frac{5}{2})$  | 17580.1502             | 2.31                        |
| $2_{20}(\frac{7}{2}) \leftarrow 1_{11}(\frac{5}{2})$  | 17578.2842             | -4.16                       |
| $2_{20}(\frac{5}{2}) \leftarrow 1_{11}(\frac{3}{2})$  | 17587.6884             | 1.12                        |
| $2_{20}(\frac{3}{2}) \leftarrow 1_{11}(\frac{1}{2})$  | 17572.7310             | -4.19                       |
| $2_{20}(\frac{3}{2}) \leftarrow 1_{11}(\frac{3}{2})$  | 17586.3581             | 1.80                        |
| $3_{21}(\frac{9}{2}) \leftarrow 2_{20}(\frac{7}{2})$  | 17657.7651             | 0.12                        |
| $3_{21}(\frac{5}{2}) \leftarrow 2_{20}(\frac{3}{2})$  | 17660.9323             | 1.10                        |
| $4_{04}(\frac{11}{2}) \leftarrow 3_{13}(\frac{9}{2})$ | 17989.6094             | 2.16                        |
| $4_{04}(\frac{9}{2}) \leftarrow 3_{13}(\frac{7}{2})$  | 17989.1099             | 2.11                        |
| $4_{04}(\frac{7}{2}) \leftarrow 3_{13}(\frac{5}{2})$  | 17988.5873             | 0.98                        |
| $4_{04}(\frac{5}{2}) \leftarrow 3_{13}(\frac{3}{2})$  | 17989.0819             | -3.23                       |
| $4_{04}(\frac{7}{2}) \leftarrow 3_{13}(\frac{7}{2})$  | 17991.3818             | -1.89                       |

D1. Assigned Transitions for *g'*-ga 2-chloropropan-1-ol, <sup>35</sup>Cl Isotopomer

| Transition                                           | $\nu_{obs}/\text{MHz}$ | $\nu_{obs-pred}/\text{kHz}$ |
|------------------------------------------------------|------------------------|-----------------------------|
| $1_{11}(\frac{3}{2}) \leftarrow 0_{00}(\frac{3}{2})$ | 7290.1703              | 0.14                        |
| $1_{11}(\frac{5}{2}) \leftarrow 0_{00}(\frac{3}{2})$ | 7290.6165              | 2.72                        |
| $1_{11}(\frac{1}{2}) \leftarrow 0_{00}(\frac{3}{2})$ | 7291.0044              | -1.90                       |
| $1_{10}(\frac{1}{2}) \leftarrow 0_{00}(\frac{3}{2})$ | 8063.5306              | -1.60                       |
| $1_{10}(\frac{5}{2}) \leftarrow 0_{00}(\frac{3}{2})$ | 8067.8982              | -0.06                       |
| $1_{10}(\frac{3}{2}) \leftarrow 0_{00}(\frac{3}{2})$ | 8073.4418              | -1.09                       |
| $3_{12}(\frac{7}{2}) \leftarrow 2_{20}(\frac{5}{2})$ | 11840.6454             | -3.39                       |
| $3_{12}(\frac{5}{2}) \leftarrow 2_{20}(\frac{5}{2})$ | 11841.1618             | -3.33                       |
| $3_{12}(\frac{5}{2}) \leftarrow 2_{20}(\frac{3}{2})$ | 11845.3596             | -0.63                       |
| $3_{12}(\frac{7}{2}) \leftarrow 2_{21}(\frac{5}{2})$ | 12043.4796             | 2.66                        |
| $3_{12}(\frac{5}{2}) \leftarrow 2_{21}(\frac{3}{2})$ | 12047.6264             | 2.89                        |
| $2_{11}(\frac{1}{2}) \leftarrow 1_{01}(\frac{1}{2})$ | 14325.2648             | 1.26                        |
| $2_{11}(\frac{3}{2}) \leftarrow 1_{01}(\frac{1}{2})$ | 14325.7236             | 1.67                        |
| $2_{11}(\frac{7}{2}) \leftarrow 1_{01}(\frac{5}{2})$ | 14329.5596             | 2.16                        |
| $2_{11}(\frac{5}{2}) \leftarrow 1_{01}(\frac{5}{2})$ | 14330.0213             | 0.03                        |
| $2_{11}(\frac{3}{2}) \leftarrow 1_{01}(\frac{3}{2})$ | 14334.7972             | 0.41                        |
| $2_{11}(\frac{5}{2}) \leftarrow 1_{01}(\frac{3}{2})$ | 14335.1195             | -2.42                       |
| $3_{03}(\frac{5}{2}) \leftarrow 2_{12}(\frac{3}{2})$ | 14484.3846             | -0.85                       |
| $3_{03}(\frac{7}{2}) \leftarrow 2_{12}(\frac{5}{2})$ | 14485.1669             | 0.55                        |
| $3_{03}(\frac{3}{2}) \leftarrow 2_{12}(\frac{1}{2})$ | 14485.6880             | 0.24                        |
| $3_{03}(\frac{9}{2}) \leftarrow 2_{12}(\frac{7}{2})$ | 14486.4389             | 1.52                        |
| $2_{21}(\frac{1}{2}) \leftarrow 1_{11}(\frac{3}{2})$ | 17940.5259             | -1.34                       |
| $2_{21}(\frac{7}{2}) \leftarrow 1_{11}(\frac{5}{2})$ | 17943.6598             | 2.39                        |
| $2_{21}(\frac{3}{2}) \leftarrow 1_{11}(\frac{1}{2})$ | 17944.7078             | -1.03                       |
| $2_{21}(\frac{3}{2}) \leftarrow 1_{11}(\frac{3}{2})$ | 17945.5440             | -0.98                       |

| Transition                                           | $\nu_{obs}/\text{MHz}$ | $\nu_{obs-pred}/\text{kHz}$ |
|------------------------------------------------------|------------------------|-----------------------------|
| $2_{21}(\frac{5}{2}) \leftarrow 1_{11}(\frac{5}{2})$ | 17948.7265             | -5.09                       |
| $2_{21}(\frac{5}{2}) \leftarrow 1_{11}(\frac{3}{2})$ | 17949.1796             | 4.39                        |
